# Supplementary material
Source: PubMed Central journal article supplement (PMC6637165)

# Influenza A or B

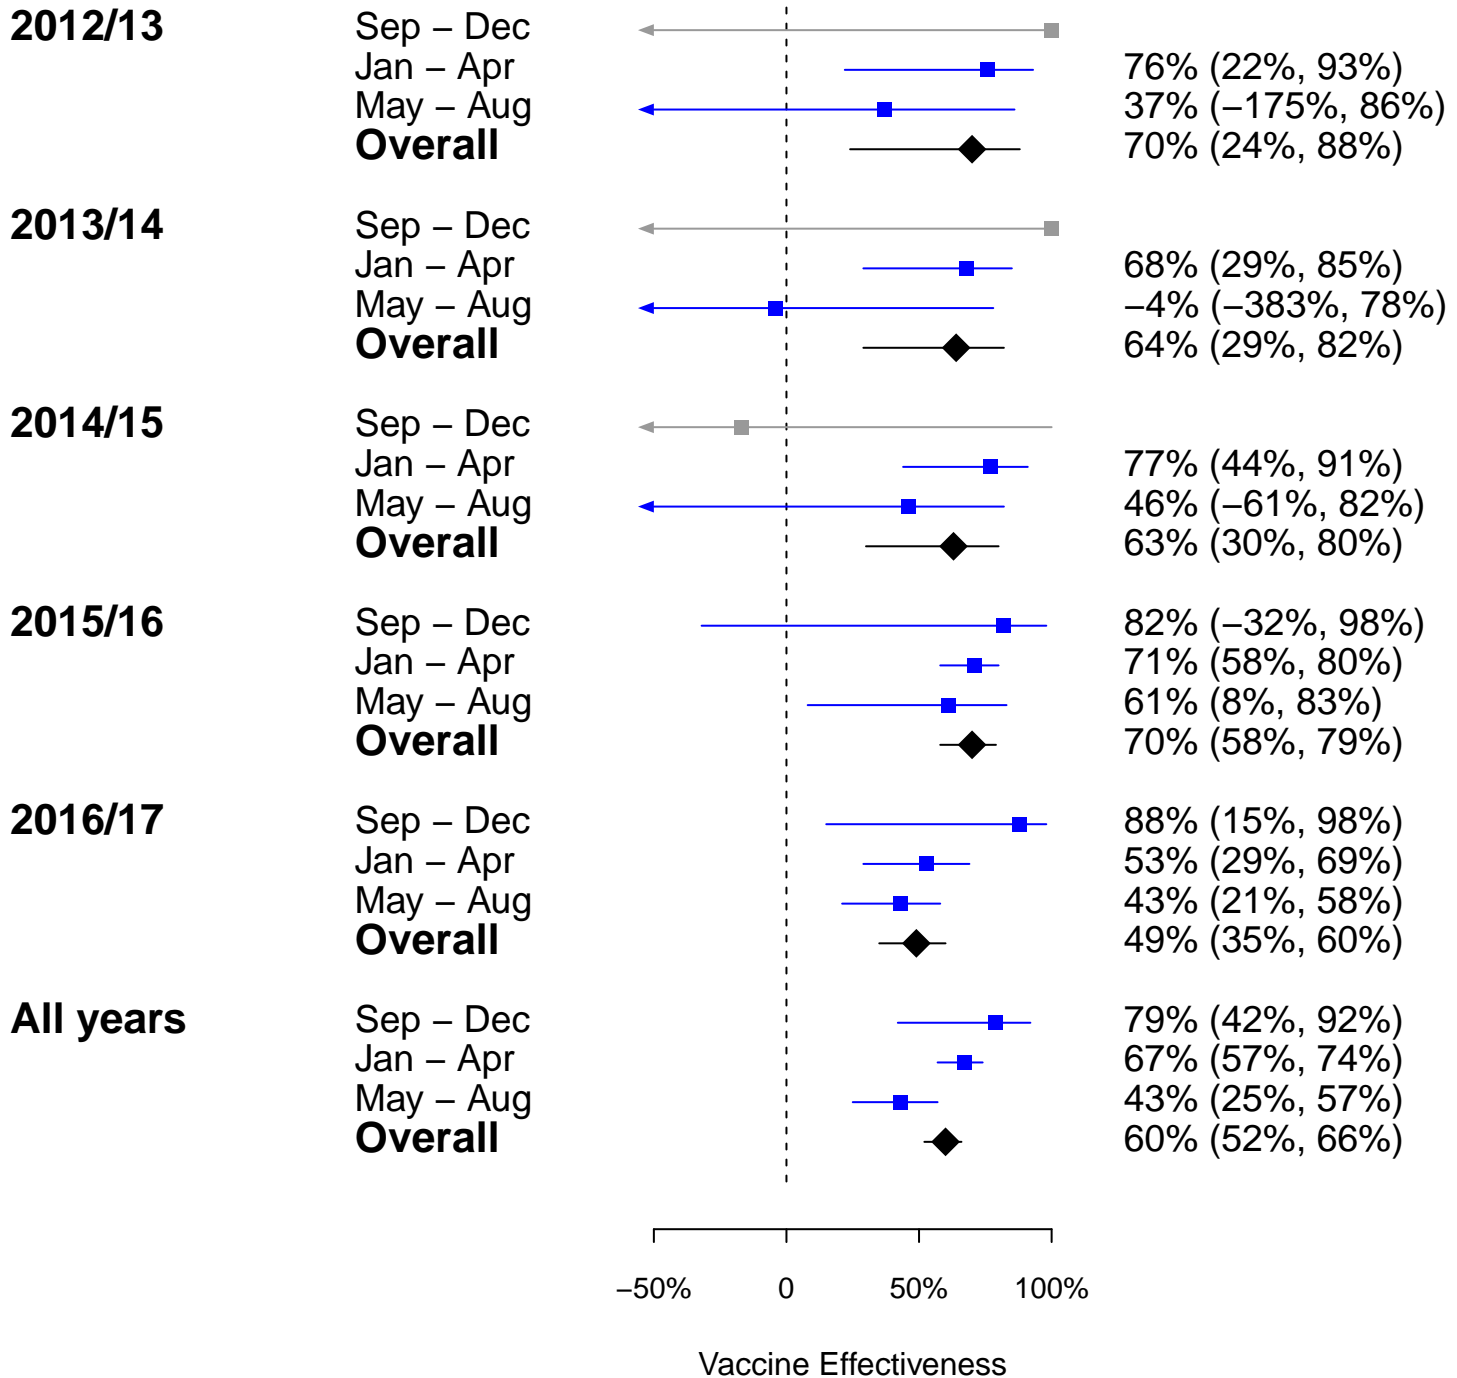

Supplement: NIHMS1038063-supplement-Figure_S1.pdf [file NIHMS1038063-supplement-Figure_S1.pdf]

# Influenza A or B

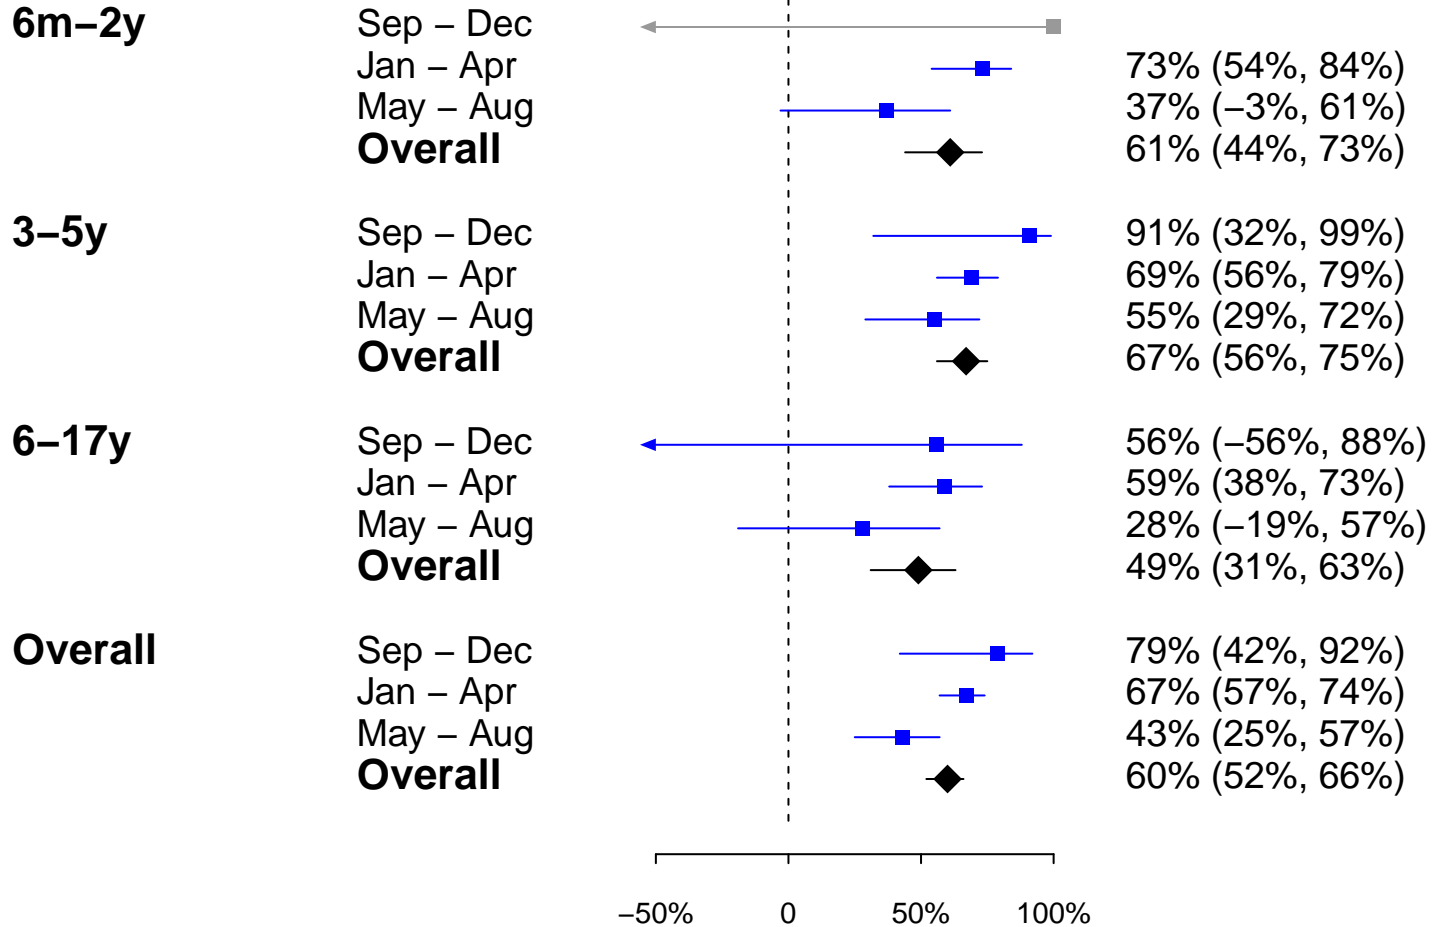

Vaccine Effectiveness

Supplement: NIHMS1038063-supplement-Figure_S2.pdf [file NIHMS1038063-supplement-Figure_S2.pdf]

# Influenza A(H1N1)

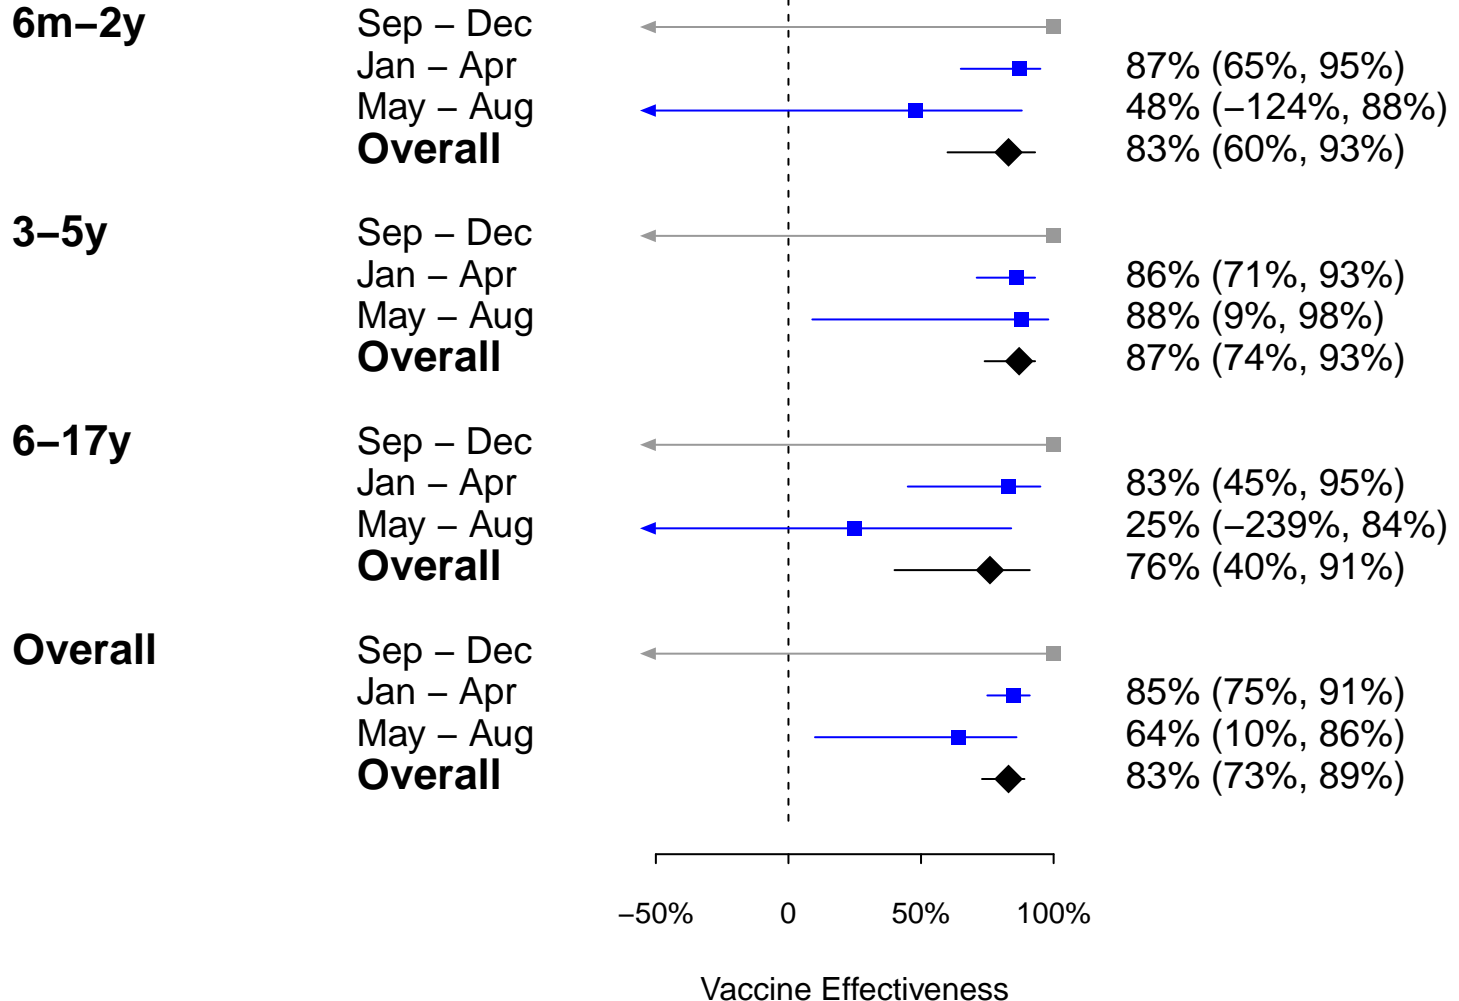

Supplement: NIHMS1038063-supplement-Figure_S3.pdf [file NIHMS1038063-supplement-Figure_S3.pdf]

# Influenza A(H3N2)

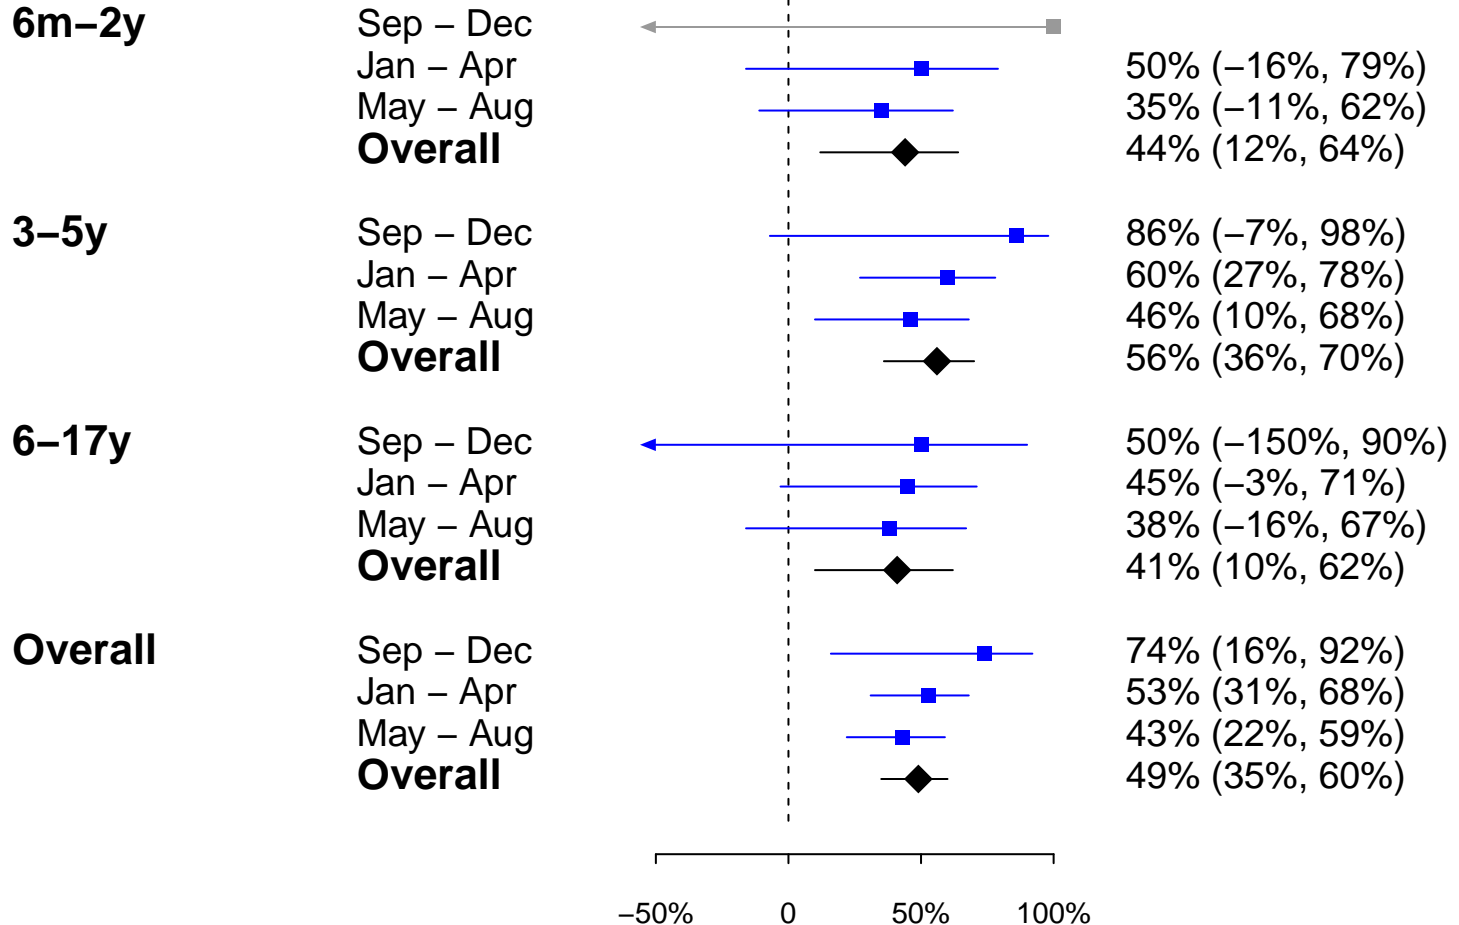

Vaccine Effectiveness

Supplement: NIHMS1038063-supplement-Figure_S4.pdf [file NIHMS1038063-supplement-Figure_S4.pdf]

# Influenza B

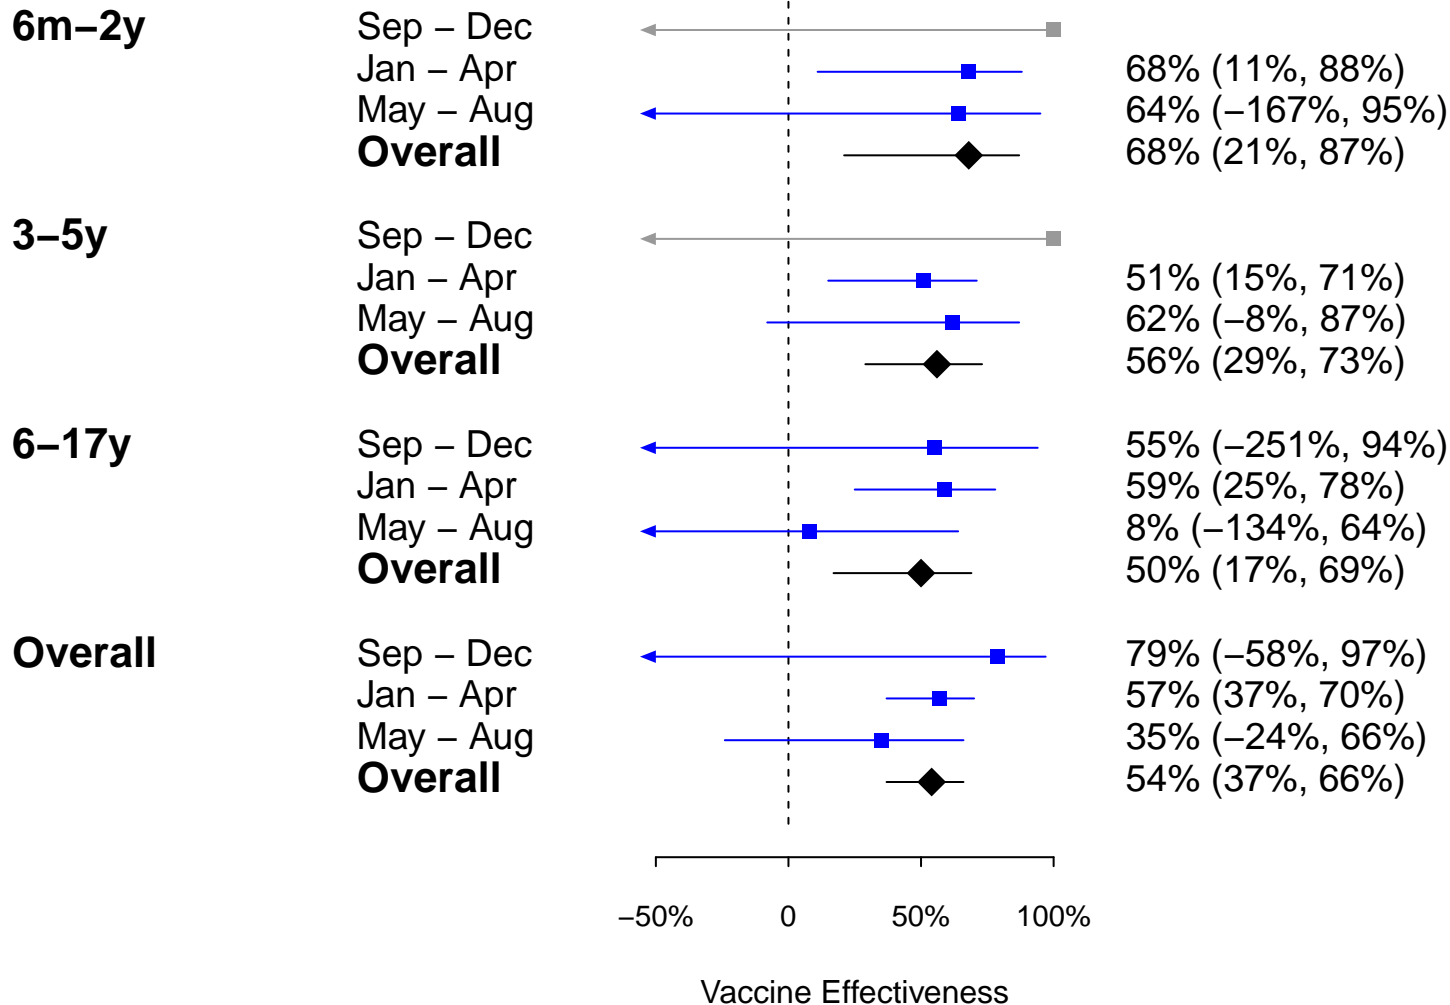

Supplement: NIHMS1038063-supplement-Figure_S5.pdf [file NIHMS1038063-supplement-Figure_S5.pdf]

# Influenza A or B

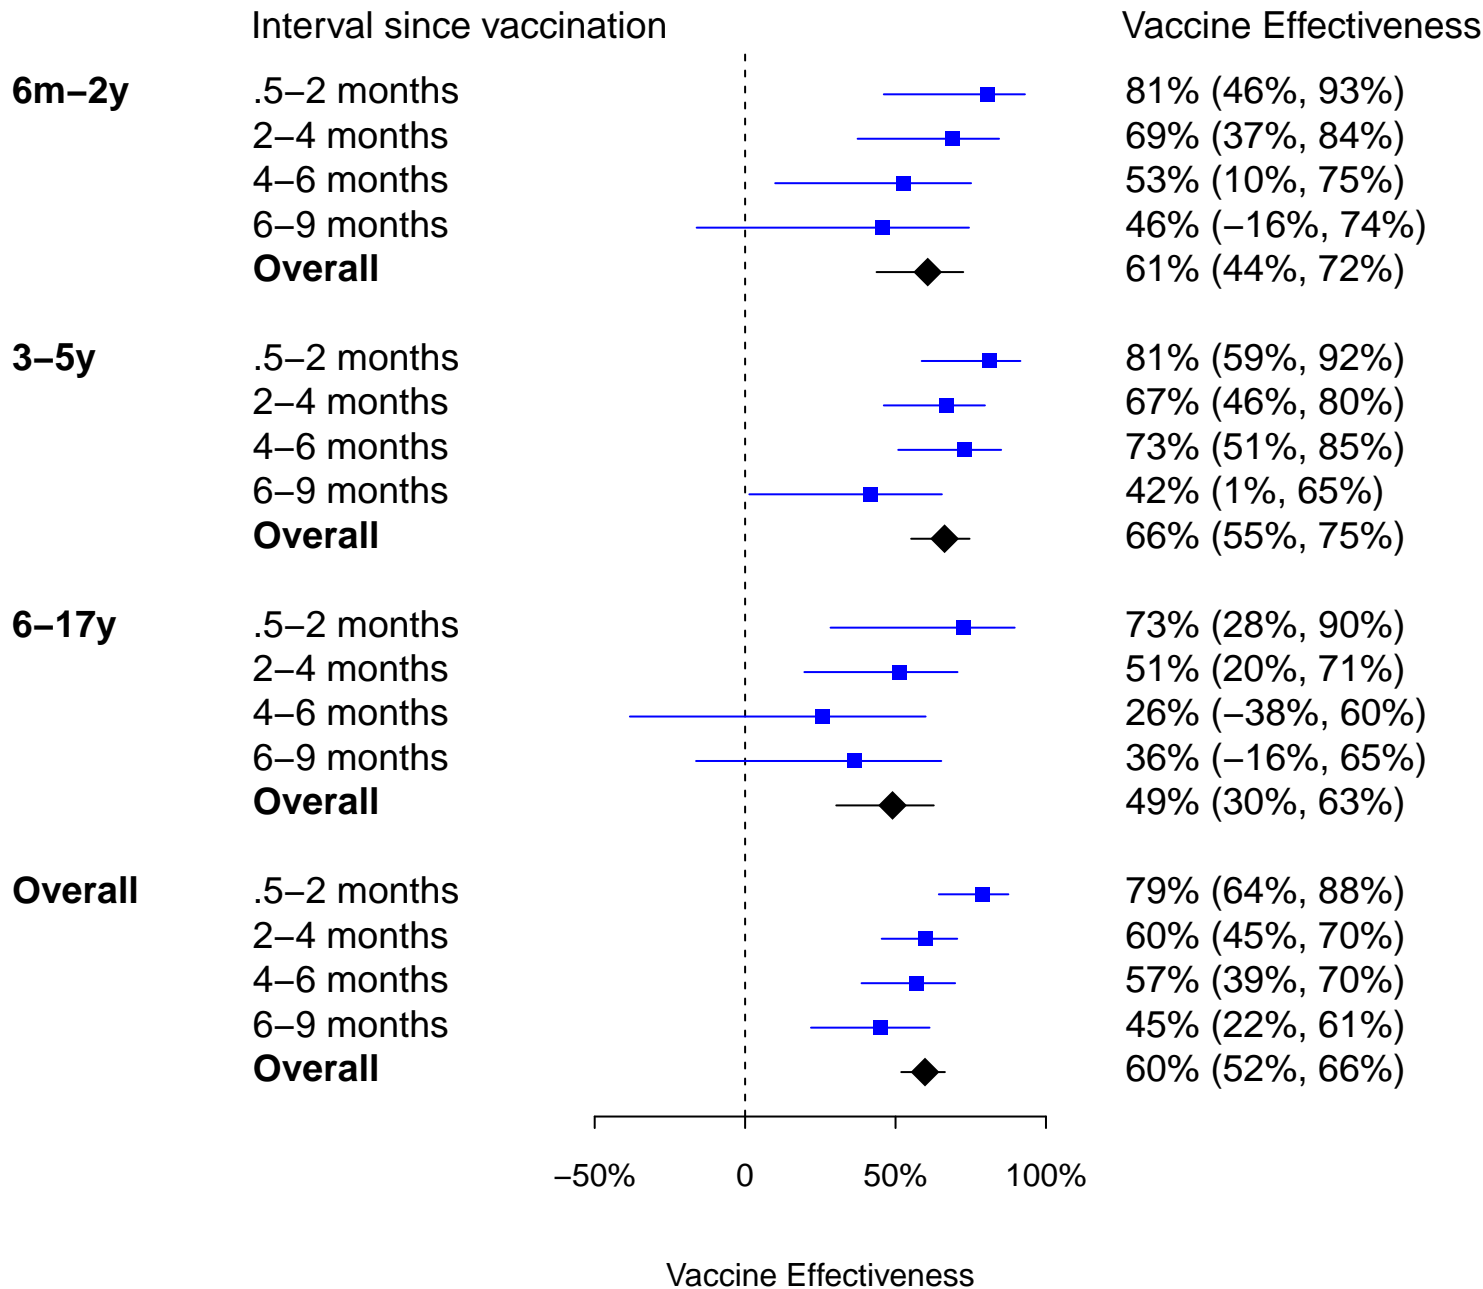

Supplement: NIHMS1038063-supplement-Figure_S6.pdf [file NIHMS1038063-supplement-Figure_S6.pdf]

### Influenza A(H1N1), 2012/13 – 2016/17

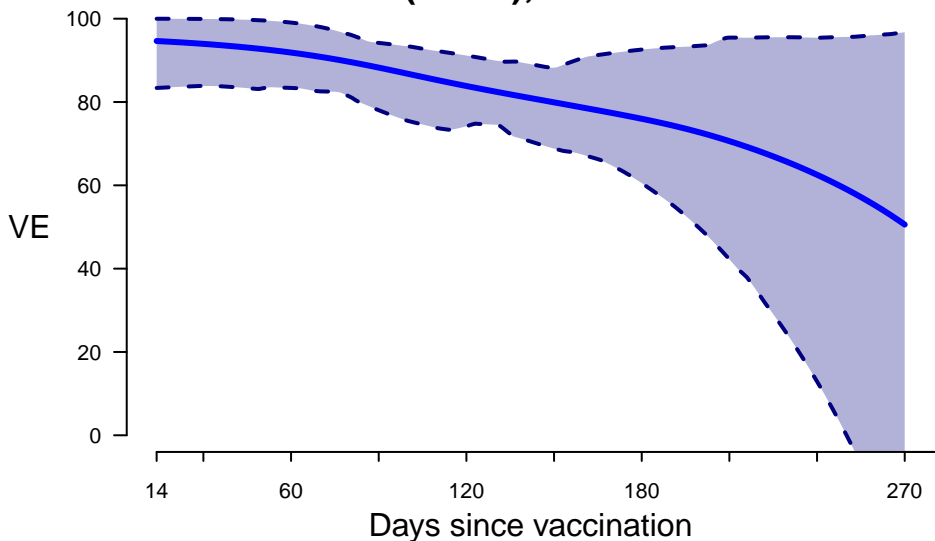

### Influenza A(H3N2), 2016/17

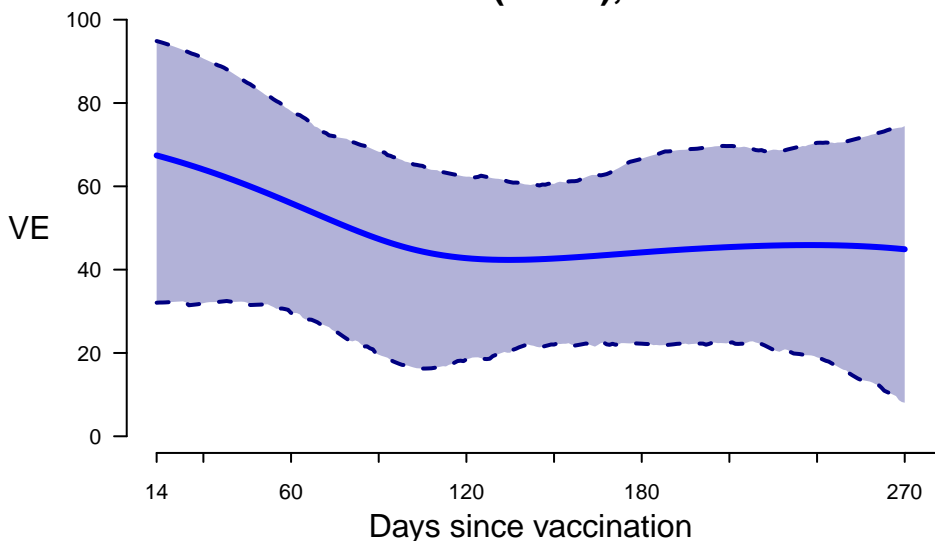

### Influenza B, 2015/16

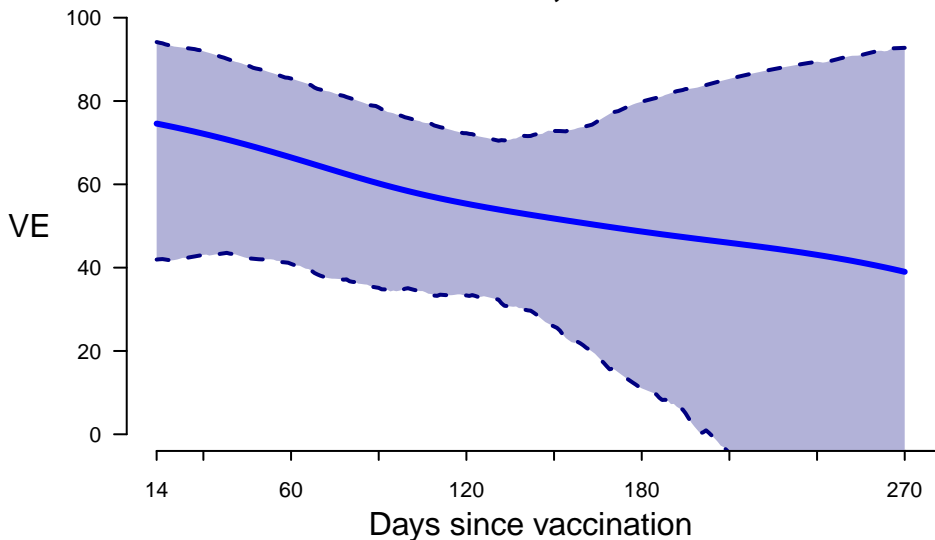

Supplement: NIHMS1038063-supplement-Figure_S8.pdf [file NIHMS1038063-supplement-Figure_S8.pdf]
